# Supplementary material for: A novel hybrid fluorescence probe sensor based on metal–organic framework@carbon quantum dots for the highly selective detection of 6-mercaptopurine
Source: Royal Society of Chemistry journal article supplement (doi:10.1039/d0ay01592j), 2020-01-01
Supplement: d0ay01592j1.pdf [file d0ay01592j1.pdf]

## Supporting Information

### A novel hybrid fluorescence probe sensor based on metal-organic frameworks@carbon quantum dots for highly selective detection of 6-mercaptopurine

Aida Mousavi, Rouholah Zare-Dorabei \*, Seyed Hossein Mosavi

Research Laboratory of Spectrometry & Micro and Nano Extraction, Department of Chemistry, Iran

University of Science and Technology, Tehran 16846-13114, Iran

\* **Corresponding author:** E-mail address: [zaredorabei@iust.ac.ir](mailto:zaredorabei@iust.ac.ir) (Rouholah Zare-Dorabei)

Tel: +98 21 77240646 & Fax: +98 21 77491204

#### Supplementary Tables

**Table S1.** BET analysis results of MIL-101(Fe) and MIL-101(Fe)@amine-CQDs

| BET Analysis |                                                 | MIL-101(Fe)                              | MIL-101(Fe)@amine-CQDs                   |
|--------------|-------------------------------------------------|------------------------------------------|------------------------------------------|
| Surface Area | BET Surface Area                                | 267.4430 m <sup>2</sup> g <sup>-1</sup>  | 41.6725 m <sup>2</sup> g <sup>-1</sup>   |
|              | Langmuir Surface Area                           | 356.9236 m <sup>2</sup> g <sup>-1</sup>  | 58.1147 m <sup>2</sup> g <sup>-1</sup>   |
|              | BJH Adsorption Cumulative surface area of pores | 59.257 m <sup>2</sup> g <sup>-1</sup>    | 31.183 m <sup>2</sup> g <sup>-1</sup>    |
|              | BJH Desorption Cumulative surface area of pores | 33.0478 m <sup>2</sup> g <sup>-1</sup>   | 29.1934 m <sup>2</sup> g <sup>-1</sup>   |
| Pore Volume  | BJH Adsorption Cumulative volume of pore        | 0.176010 cm <sup>3</sup> g <sup>-1</sup> | 0.119917 cm <sup>3</sup> g <sup>-1</sup> |
|              | BJH Desorption Cumulative volume of pore        | 0.146439 cm <sup>3</sup> g <sup>-1</sup> | 0.117461 cm <sup>3</sup> g <sup>-1</sup> |
| Pore Size    | BJH Adsorption average pore width               | 118.812 Å                                | 153.825 Å                                |
|              | BJH Desorption average pore width               | 177.245 Å                                | 160.942 Å                                |

## Supplementary Figures

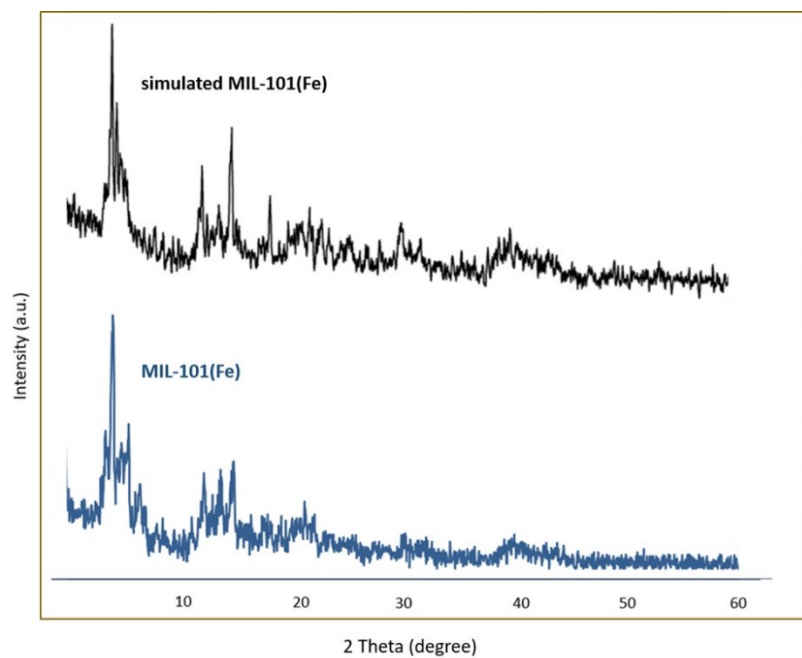

**Figure S1.** XRD patterns of as-synthesized MIL-101(Fe) and simulated MIL-101(Fe)

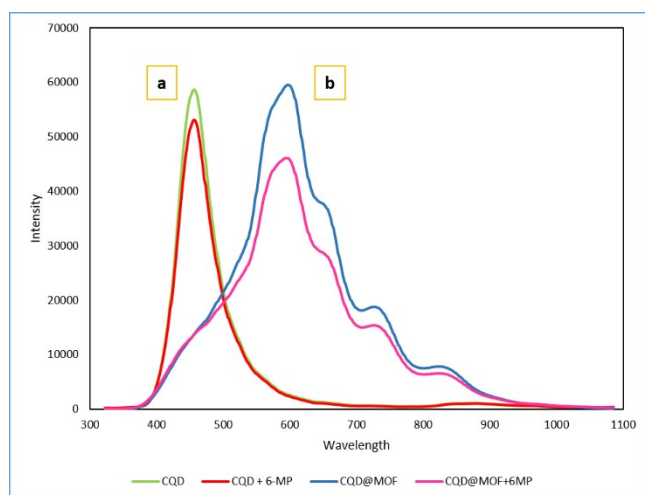

**Figure S2.** the fluorescence spectrum of (a) amine-CQDs (green line) and amine-CQDs with 6-MP (red line) (6-MP=0.167ppm), (b) MIL-101(Fe)@amine-CQDs (blue line) and MIL-101(Fe)@amine-CQDs with 6-MP (pink line) (6-MP=0.333ppb,  $C_{\text{MIL-101(Fe)@amine-CQDs}}=200\text{ppm}$ )

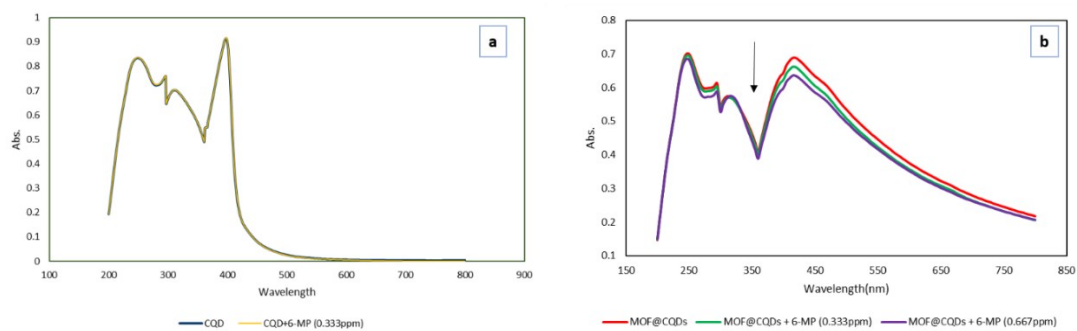

**Figure S3.** UV-vis absorption spectrum of (a) amine-CQDs and amine-CQDs with 6-MP, (b) MIL-101(Fe)@amine-CQDs and MIL-101(Fe)@amine-CQDs with 6-MP ( $C_{\text{MIL-101(Fe)@amine-CQDs}}=200\text{mg L}^{-1}$ ,  $C_{6\text{-MP}}=333\text{mg L}^{-1}$  and  $667\text{mg L}^{-1}$ )

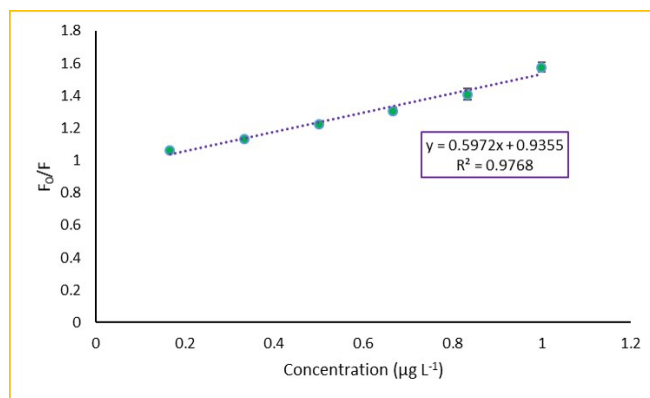

**Figure S4.** Stern–Volmer plot in different concentrations of 6-MP (pH=4.6 and  $C_{\text{MIL-101(Fe)@amine-CQDs}}=200\text{mg L}^{-1}$ ).
